# Supplementary material for: Impact of Different Types of Nosocomial Infection on the Neurodevelopmental Outcome of Very Low Birth Weight Infants
Source: PubMed Central journal article supplement (PMC8000764; doi:10.3390/children8030207), 2021-03-09
Supplement: children-08-00207-s001.pdf [file children-08-00207-s001.pdf]

**Supplementary Materials:** The following are available online at <https://www.mdpi.com/2227-9067/8/3/207/s1>.

**Table 1.** Baseline characteristics of infants, who completed the study vs. infants, who were lost to follow up or died. *p*-values were calculated towards those infants, who completed the study.

| Characteristics                                                                     | Assessed at 2 years of age<br>n=600 | Lost to follow up<br>n=350 | <i>p</i> | Died<br>n=96 | <i>p</i> |
|-------------------------------------------------------------------------------------|-------------------------------------|----------------------------|----------|--------------|----------|
| <b>Nosocomial infections (NI)</b>                                                   | 230/600 (38%)                       | 77/350 (22%)               | 0.000*   | 39/96 (40%)  | 0.463    |
| No NI                                                                               | 370/600 (62%)                       | 273/350 (78%)              | 0.020*   | 57/96 (59%)  | 0.909    |
| Suspected NI                                                                        | 71/600 (12%)                        | 27/350 (8%)                | 0.015*   | 13/96 (13%)  | 0.534    |
| Gram-positive NI                                                                    | 108/600 (18%)                       | 31/350 (12%)               | 0.000*   | 7/96 (7%)    | 0.018*   |
| Gram-negative NI                                                                    | 14/600 (2%)                         | 11/350 (3%)                | 0.553    | 6/96 (6%)    | 0.019*   |
| Fungal NI                                                                           | 4/600 (1%)                          | 0/350 (0%)                 | 0.303    | 1/96 (1%)    | 0.383    |
| <b>Antenatal steroids</b>                                                           | 578/600 (96%)                       | 335/350 (96%)              | 0.734    | 89/96 (9%)   | 0.179    |
| <b>Cesarean delivery</b>                                                            | 531/600 (89%)                       | 324/350 (93%)              | 0.164    | 72/96 (75%)  | 0.000*   |
| <b>5-min APGAR score, mean (SD)</b>                                                 | 8 (1)                               | 9 (1)                      | 0.363    | 8 (1)        | 0.996    |
| <b>Early onset sepsis (EOS)</b>                                                     | 11/600 (2%)                         | 11/350 (3%)                | 0.263    | 2/96 (2%)    | 1.000    |
| <b>Birth weight (g)</b>                                                             |                                     |                            |          |              |          |
| Birth weight, mean (SD), g                                                          | 927 (263)                           | 1091 (249)                 | 0.000*   | 670 (187)    | 0.000*   |
| 401-500                                                                             | 15/600 (3%)                         | 2/350 (1%)                 | 0.040    | 15/96 (16%)  | 0.000*   |
| 501-750                                                                             | 169/600 (28%)                       | 38/350 (11%)               | 0.000*   | 56/96 (58%)  | 0.000*   |
| 751-1000                                                                            | 193/600 (32%)                       | 81/350 (23%)               | 0.000*   | 20/96 (21%)  | 0.031    |
| 1001-1500                                                                           | 223/600 (37%)                       | 229/350 (65%)              | 0.000*   | 5/96 (5%)    | 0.000*   |
| <b>Gestational age (wk)</b>                                                         |                                     |                            |          |              |          |
| Gestational age, mean (SD), wk                                                      | 27 (2)                              | 28 (2)                     | 0.000*   | 25 (2)       | 0.000*   |
| <25                                                                                 | 90/600 (15%)                        | 23/350 (7%)                | 0.000*   | 49/96 (51%)  | 0.000*   |
| 25-27                                                                               | 272/600 (45%)                       | 91/350 (26%)               | 0.000*   | 36/96 (38%)  | 0.184    |
| 28-31                                                                               | 238/600 (40%)                       | 236/350 (67%)              | 0.000*   | 11/96 (11%)  | 0.000*   |
| <b>Male</b>                                                                         | 314/600 (52%)                       | 171/350 (49%)              | 0.313    | 55/96 (57%)  | 0.284    |
| <b>Multiples</b>                                                                    | 217/600 (36%)                       | 164/350 (47%)              | 0.001*   | 32/96 (33%)  | 0.228    |
| <b>Respiratory Support</b>                                                          |                                     |                            |          |              |          |
| Mechanical ventilation                                                              | 236/600 (39%)                       | 82/350 (23%)               | 0.000*   | 89/96 (93%)  | 0.000*   |
| Mechanical ventilation, mean (SD), days                                             | 4 (8)                               | 3 (7)                      | 0.006*   | 12 (14)      | 0.000*   |
| Duration of continuous positive airway pressure (CPAP) ventilation, mean (SD), days | 22 (17)                             | 13 (14)                    | 0.000*   | 5 (9)        | 0.000*   |
| <b>BPD</b>                                                                          | 104/600 (17%)                       | 34/350 (10%)               | 0.001*   | 6/96 (6%)    | 0.028*   |
| <b>Brain Injury</b>                                                                 | 55/600 (9%)                         | 12/350 (3%)                | 0.000*   | 50/96 (52%)  | 0.000*   |
| <b>NEC</b>                                                                          | 33/600 (5%)                         | 8/350 (2%)                 | 0.020*   | 12/96 (13%)  | 0.002*   |
| <b>Postnatal steroids</b>                                                           | 39/600 (7%)                         | 11/350 (3%)                | 0.000*   | 10/96 (10%)  | 0.060    |
| Characteristics                                                                     | Assessed at 2 years of age<br>n=600 | Lost to follow up<br>n=350 | <i>p</i> | Died<br>n=96 | <i>p</i> |
| <b>Nosocomial infections (NI)</b>                                                   | 197/600 (33%)                       | 77/350 (22%)               | 0.000*   | 39/96 (40%)  | 0.463    |
| No NI                                                                               | 403/600 (67%)                       | 273/350 (78%)              | 0.020*   | 57/96 (59%)  | 0.909    |
| Suspected NI                                                                        | 71/600 (12%)                        | 27/350 (8%)                | 0.015*   | 13/96 (13%)  | 0.534    |
| Gram-positive NI                                                                    | 108/600 (18%)                       | 31/350 (12%)               | 0.000*   | 7/96 (7%)    | 0.018*   |
| Gram-negative NI                                                                    | 14/600 (2%)                         | 11/350 (3%)                | 0.553    | 6/96 (6%)    | 0.019*   |
| Fungal NI                                                                           | 4/600 (1%)                          | 0/350 (0%)                 | 0.303    | 1/96 (1%)    | 0.383    |
| <b>Antenatal steroids</b>                                                           | 578/600 (96%)                       | 335/350 (96%)              | 0.734    | 89/96 (9%)   | 0.179    |
| <b>Cesarean delivery</b>                                                            | 531/600 (89%)                       | 324/350 (93%)              | 0.164    | 72/96 (75%)  | 0.000*   |
| <b>5-min APGAR score, mean (SD)</b>                                                 | 8 (1)                               | 9 (1)                      | 0.363    | 8 (1)        | 0.996    |

|                                                                                     |               |               |        |             |        |
|-------------------------------------------------------------------------------------|---------------|---------------|--------|-------------|--------|
| <b>Early onset sepsis (EOS)</b>                                                     | 11/600 (2%)   | 11/350 (3%)   | 0.263  | 2/96 (2%)   | 1.000  |
| <b>Birth weight (g)</b>                                                             |               |               |        |             |        |
| Birth weight, mean (SD), g                                                          | 927 (263)     | 1091 (249)    | 0.000* | 670 (187)   | 0.000* |
| 401-500                                                                             | 15/600 (3%)   | 2/350 (1%)    | 0.040  | 15/96 (16%) | 0.000* |
| 501-750                                                                             | 169/600 (28%) | 38/350 (11%)  | 0.000* | 56/96 (58%) | 0.000* |
| 751-1000                                                                            | 193/600 (32%) | 81/350 (23%)  | 0.000* | 20/96 (21%) | 0.031  |
| 1001-1500                                                                           | 223/600 (37%) | 229/350 (65%) | 0.000* | 5/96 (5%)   | 0.000* |
| <b>Gestational age (wk)</b>                                                         |               |               |        |             |        |
| Gestational age, mean (SD), wk                                                      | 27 (2)        | 28 (2)        | 0.000* | 25 (2)      | 0.000* |
| <25                                                                                 | 90/600 (15%)  | 23/350 (7%)   | 0.000* | 49/96 (51%) | 0.000* |
| 25-27                                                                               | 272/600 (45%) | 91/350 (26%)  | 0.000* | 36/96 (38%) | 0.184  |
| 28-31                                                                               | 238/600 (40%) | 236/350 (67%) | 0.000* | 11/96 (11%) | 0.000* |
| <b>Male</b>                                                                         | 314/600 (52%) | 171/350 (49%) | 0.313  | 55/96 (57%) | 0.284  |
| <b>Multiples</b>                                                                    | 217/600 (36%) | 164/350 (47%) | 0.001* | 32/96 (33%) | 0.228  |
| <b>Respiratory Support</b>                                                          |               |               |        |             |        |
| Mechanical ventilation                                                              | 236/600 (39%) | 82/350 (23%)  | 0.000* | 89/96 (93%) | 0.000* |
| Mechanical ventilation, mean (SD), days                                             | 4 (8)         | 3 (7)         | 0.006* | 12 (14)     | 0.000* |
| Duration of continuous positive airway pressure (CPAP) ventilation, mean (SD), days | 22 (17)       | 13 (14)       | 0.000* | 5 (9)       | 0.000* |
| <b>BPD</b>                                                                          | 104/600 (17%) | 34/350 (10%)  | 0.001* | 6/96 (6%)   | 0.028* |
| <b>Brain Injury</b>                                                                 | 55/600 (9%)   | 12/350 (3%)   | 0.000* | 50/96 (52%) | 0.000* |
| <b>NEC</b>                                                                          | 33/600 (5%)   | 8/350 (2%)    | 0.020* | 12/96 (13%) | 0.002* |
| <b>Postnatal steroids</b>                                                           | 39/600 (7%)   | 11/350 (3%)   | 0.000* | 10/96 (10%) | 0.060  |

Table S2. Baseline characteristics of uninfected infants versus infants with NIs.

| Characteristics                                                                     | Uninfected<br>n = 370 (62%) | NI<br>n=230 (38%) | p      |
|-------------------------------------------------------------------------------------|-----------------------------|-------------------|--------|
| <b>Antenatal steroids</b>                                                           | 357/370 (96%)               | 221/230 (97%)     | 0.664  |
| <b>Cesarean delivery</b>                                                            | 344/370 (93%)               | 187/230 (84%)     | 0.001* |
| <b>5-min APGAR score, mean (SD)</b>                                                 | 8 (1)                       | 8 (1)             | 0.332  |
| <b>Early-onset sepsis (EOS)</b>                                                     | 9/370 (2%)                  | 2/230 (1%)        | 0.219  |
| <b>Birth weight (g)</b>                                                             |                             |                   |        |
| Birth weight, mean (SD), g                                                          | 1004 (247)                  | 802 (237)         | 0.000* |
| 401-500                                                                             | 4/370 (1%)                  | 11/230 (5%)       | 0.006* |
| 501-750                                                                             | 67/370 (18%)                | 102/230 (45%)     | 0.000* |
| 751-1000                                                                            | 119/370 (32%)               | 74/230 (31%)      | 0.929  |
| 1001-1500                                                                           | 180/370 (49%)               | 43/230 (19%)      | 0.494  |
| <b>Gestational age (wk)</b>                                                         |                             |                   |        |
| Gestational age, mean (SD), wk                                                      | 27 (2)                      | 26 (2)            | 0.000* |
| <25                                                                                 | 21/370 (6%)                 | 69/230 (30%)      | 0.000* |
| 25-27                                                                               | 154/370 (42%)               | 118/230 (51%)     | 0.023* |
| 28-31                                                                               | 195/370 (52%)               | 43/230 (19%)      | 0.000* |
| <b>Male</b>                                                                         | 188/370 (51%)               | 126/230 (55%)     | 0.356  |
| <b>Multiples</b>                                                                    | 147/370 (40%)               | 70/230 (30%)      | 0.023* |
| <b>Respiratory Support</b>                                                          |                             |                   |        |
| Mechanical ventilation                                                              | 93/270 (25%)                | 143/230 (62%)     | 0.000* |
| Mechanical ventilation, mean (SD), days                                             | 5 (2)                       | 8 (11)            | 0.000* |
| Duration of continuous positive airway pressure (CPAP) ventilation, mean (SD), days | 15 (17)                     | 30 (16)           | 0.000* |

|                                                                                     |                                     |                           |          |
|-------------------------------------------------------------------------------------|-------------------------------------|---------------------------|----------|
| <b>BPD</b>                                                                          | 41/370 (11%)                        | 63/230 (27%)              | 0.000*   |
| <b>Brain Injury</b>                                                                 | 24/370 (6%)                         | 31/230 (14%)              | 0.001*   |
| <b>Postnatal steroids</b>                                                           | 8/370 (2%)                          | 31/230 (13%)              | 0.000*   |
| <b>Characteristics</b>                                                              | <b>Uninfected<br/>n = 370 (62%)</b> | <b>NI<br/>n=230 (38%)</b> | <b>p</b> |
| <b>Antenatal steroids</b>                                                           | 357/370 (96%)                       | 221/230 (97%)             | 0.664    |
| <b>Cesarean delivery</b>                                                            | 344/370 (93%)                       | 187/230 (84%)             | 0.001*   |
| <b>5-min APGAR score, mean (SD)</b>                                                 | 8 (1)                               | 8 (1)                     | 0.332    |
| <b>Early-onset sepsis (EOS)</b>                                                     | 9/370 (2%)                          | 2/230 (1%)                | 0.219    |
| <b>Birth weight (g)</b>                                                             |                                     |                           |          |
| Birth weight, mean (SD), g                                                          | 1004 (247)                          | 802 (237)                 | 0.000*   |
| 401-500                                                                             | 4/370 (1%)                          | 11/230 (5%)               | 0.006*   |
| 501-750                                                                             | 67/370 (18%)                        | 102/230 (45%)             | 0.000*   |
| 751-1000                                                                            | 119/370 (32%)                       | 74/230 (31%)              | 0.929    |
| 1001-1500                                                                           | 180/370 (49%)                       | 43/230 (19%)              | 0.494    |
| <b>Gestational age (wk)</b>                                                         |                                     |                           |          |
| Gestational age, mean (SD), wk                                                      | 27 (2)                              | 26 (2)                    | 0.000*   |
| <25                                                                                 | 21/370 (6%)                         | 69/230 (30%)              | 0.000*   |
| 25-27                                                                               | 154/370 (42%)                       | 118/230 (51%)             | 0.023*   |
| 28-31                                                                               | 195/370 (52%)                       | 43/230 (19%)              | 0.000*   |
| <b>Male</b>                                                                         | 188/370 (51%)                       | 126/230 (55%)             | 0.356    |
| <b>Multiples</b>                                                                    | 147/370 (40%)                       | 70/230 (30%)              | 0.023*   |
| <b>Respiratory Support</b>                                                          |                                     |                           |          |
| Mechanical ventilation                                                              | 93/270 (25%)                        | 143/230 (62%)             | 0.000*   |
| Mechanical ventilation, mean (SD), days                                             | 5 (2)                               | 8 (11)                    | 0.000*   |
| Duration of continuous positive airway pressure (CPAP) ventilation, mean (SD), days | 15 (17)                             | 30 (16)                   | 0.000*   |
| <b>BPD</b>                                                                          | 41/370 (11%)                        | 63/230 (27%)              | 0.000*   |
| <b>Brain Injury</b>                                                                 | 24/370 (6%)                         | 31/230 (14%)              | 0.001*   |
| <b>Postnatal steroids</b>                                                           | 8/370 (2%)                          | 31/230 (13%)              | 0.000*   |

**Table S3.** Baseline characteristics of uninfected infants versus infants with suspected, Gram-positive, Gram-negative, fungal NI and NEC.

| Characteristics                     | Uninfected<br>n = 370 (62%) | Suspected NI<br>n=71 (12%) | p      | Gram-pos. NI<br>n=108 (18%) | p      | Gram-neg. NI<br>n=14 (2%) | p     | NEC<br>n=33 (5%) | p      | Fungal NI<br>n=4 (1%) | p      |
|-------------------------------------|-----------------------------|----------------------------|--------|-----------------------------|--------|---------------------------|-------|------------------|--------|-----------------------|--------|
| <b>Antenatal steroids</b>           |                             |                            |        | 104/108                     |        |                           |       |                  |        |                       |        |
|                                     | 357/370 (96%)               | 69/71 (97%)                | 0.239  | (96%)                       | 0.431  | 14/14 (100%)              | 1.000 | 31/33 (94%)      | 1.000  | 3/4 (75%)             | 0.145  |
| <b>Cesarean delivery</b>            |                             |                            |        | 95/108 (88%)                | 0.241  | 3/14 (21%)                | 0.073 | 25/33 (76%)      | 0.068  | 3/4 (75%)             | 0.354  |
|                                     | 344/370 (93%)               | 61/71 (86%)                | 0.042* |                             |        |                           |       |                  |        |                       |        |
| <b>5-min APGAR score, mean (SD)</b> | 8 (1)                       | 8 (1)                      | 0.986  | 8 (1)                       | 0.997  | 8 (1)                     | 0.998 | 8 (1)            | 0.976  | 8 (1)                 | 1.000  |
| <b>Early-onset sepsis</b>           |                             |                            |        | 0/108 (0%)                  | 0.133  | 1/14 (7%)                 | 0.259 | 0/33 (0%)        | 1.000  | 0/4 (0%)              | 1.000  |
|                                     | 9/370 (2%)                  | 1/71 (1%)                  | 1.000  |                             |        |                           |       |                  |        |                       |        |
| <b>Birth weight (g)</b>             |                             |                            |        |                             |        |                           |       |                  |        |                       |        |
| Birth weight, mean (SD), g          | 1004 (247)                  | 750 (186)                  | 0.000* | 828 (250)                   | 0.000* | 810 (247)                 | 0.041 | 852 (284)        | 0.009* | 626 (37)              | 0.025  |
| 401-500                             | 4/370 (1%)                  | 5/71 (7%)                  | 0.005* | 5/108 (5%)                  | 0.092  | 1/14 (7%)                 | 0.337 | 0/33 (0%)        | 1.000  | 0/4 (0%)              |        |
| 501-750                             | 67/370 (18%)                | 33/71 (47%)                | 0.000* | 42/108 (39%)                | 0.000* | 5/14 (36%)                | 0.169 | 18/33 (55%)      | 0.001* | 4/4 (100%)            | 0.006* |
| 751-1000                            | 119/370 (32%)               | 27/71 (38%)                | 0.905  | 35/108 (33%)                | 1.000  | 7/14 (50%)                | 0.415 | 5/33 (15%)       | 0.035* | 0/4 (0%)              | 0.312  |
| 1001-1500                           | 180/370 (49%)               | 6/71 (8%)                  | 0.905  | 26/108 (24%)                | 1.000  | 1/14 (7%)                 | 0.415 | 10/33 (30%)      | 0.035* | 0/4 (0%)              | 0.312  |

|                                      |               |             |        |              |        |            |        |             |        |           |        |
|--------------------------------------|---------------|-------------|--------|--------------|--------|------------|--------|-------------|--------|-----------|--------|
| <b>Gestational age (wk)</b>          |               |             |        |              |        |            |        |             |        |           |        |
| Gestational age, mean (SD), wk       | 27 (2)        | 26 (2)      | 0.000* | 26 (2)       | 0.000* | 26 (2)     | 0.016* | 26 (2)      | 0.018* | 25 (2)    | 0.107  |
| <25                                  | 21/370 (6%)   | 26/71 (37%) | 0.000* | 29/108 (27%) | 0.000* | 4/14 (29%) | 0.076  | 8/33 (24%)  | 0.133  | 2/4 (50%) | 0.109  |
| 25-27                                | 154/370 (42%) | 34/71 (48%) | 0.578  | 61/108 (57%) | 0.010* | 8/14 (57%) | 0.449  | 14/33 (43%) | 0.858  | 1/4 (25%) | 0.630  |
| 28-31                                | 195/370 (52%) | 11/71 (15%) | 0.000* | 18/108 (16%) | 0.000* | 2/14 (14%) | 0.035* | 11/33 (33%) | 0.471  | 1/4 (25%) | 1.000  |
| <b>Male</b>                          | 188/370 (51%) | 38/71 (54%) | 0.656  | 62/108 (57%) | 0.415  | 9/14 (64%) | 0.804  | 15/33 (45%) | 0.721  | 2/4 (50%) | 1.000  |
| <b>Multiples</b>                     | 147/370 (40%) | 21/71 (30%) | 0.908  | 33/108 (30%) | 0.288  | 6/14 (43%) | 0.293  | 8/33 (24%)  | 0.191  | 2/4 (50%) | 0.458  |
| <b>Respiratory Support</b>           |               |             |        |              |        |            |        |             |        |           |        |
| Mechanical ventilation               | 93/270 (25%)  | 48/71 (68%) | 0.000* | 57/108 (53%) | 0.000* | 8/14 (57%) | 0.069  | 27/33 (82%) | 0.000* | 3/4 (75%) | 0.305  |
| Mechanical ventilation, mean (SD), d | 5 (2)         | 10 (10)     | 0.000* | 6 (9)        | 0.000* | 10 (16)    | 0.001* | 13 (11)     | 0.000* | 12 (8)    | 0.079  |
| Duration of CPAP, mean (SD), d       | 15 (17)       | 31 (16)     | 0.000* | 30 (16)      | 0.000* | 35 (15)    | 0.000* | 27 (17)     | 0.007* | 38 (9)    | 0.074  |
| <b>BPD</b>                           | 41/370 (11%)  | 23/71 (32%) | 0.000* | 25/108 (23%) | 0.031* | 3/14 (21%) | 0.498  | 11/33 (33%) | 0.018* | 1/4 (25%) | 0.534  |
| <b>Brain Injury</b>                  | 24/370 (6%)   | 20/71 (28%) | 0.000* | 13/108 (12%) | 0.193  | 2/14 (15%) | 0.371  | 4/33 (12%)  | 0.325  | 1/4 (25%) | 0.284  |
| <b>Severe ROP</b>                    | 11/370 (3%)   | 14/71 (20%) | 0.000* | 22/108 (20%) | 0.000* | 1/14 (7%)  | 0.210  | 9/33 (27%)  | 0.003* | 3/4 (75%) | 0.004* |
| <b>Postnatal steroids</b>            | 8/370 (2%)    | 12/71 (17%) | 0.000* | 14/108 (13%) | 0.000* | 3/14 (21%) | 0.079  | 1/33 (3%)   | 0.715  | 1/4 (25%) | 0.236  |

**Table S4.** Regression Model for Nosocomial Infection Subtypes excluding NEC.

|                 |                        | Regression coefficient B | Standard Error | Sig.    | 95%- Confidence interval |        | Partial Eta-Square |
|-----------------|------------------------|--------------------------|----------------|---------|--------------------------|--------|--------------------|
|                 |                        |                          |                |         | Lower                    | Upper  |                    |
| Mental Score    | Gender (Female)        | 6,862                    | 1,586          | 0,000   | 3,746                    | 9,977  | 0,031              |
|                 | Birth Weight <1000g    | -4,690                   | 1,757          | 0,008   | -8,141                   | -1,240 | 0,012              |
|                 | BPD (Yes)              | -7,085                   | 2,201          | 0,001   | 2,761                    | 11,408 | 0,017              |
|                 | Brain Injury (Yes)     | -9,586                   | 3,003          | 0,001   | 3,688                    | 15,485 | 0,017              |
|                 | Suspected NI (Yes)     | -2,938                   | 2,255          | 0,193   | -1,492                   | 7,368  | 0,003              |
|                 | Gram-positive NI (Yes) | -1,374                   | 1,993          | 0,491   | -2,540                   | 5,288  | 0,001              |
|                 | Gram-negative NI (Yes) | -2,241                   | 4,876          | 0,646   | -11,818                  | 7,336  | 0,000              |
| Funagl NI (Yes) | 6,917                  | 9,634                    | 0,473          | -25,838 | 12,005                   | 0,001  |                    |
| Motor Score     | Gender (Female)        | 4,277                    | 1,267          | 0,001   | 1,789                    | 6,766  | 0,019              |
|                 | Birth Weight <1000g    | -2,225                   | 1,403          | 0,113   | -4,981                   | 0,531  | 0,004              |
|                 | BPD (Yes)              | -6,164                   | 1,758          | 0,000   | 2,711                    | 9,617  | 0,020              |
|                 | Brain Injury (Yes)     | -16,417                  | 2,398          | 0,000   | 11,706                   | 21,127 | 0,074              |

|  |                                |        |       |       |         |       |       |
|--|--------------------------------|--------|-------|-------|---------|-------|-------|
|  | Suspected NI (Yes)             | -2,579 | 1,801 | 0,153 | -0,958  | 6,117 | 0,003 |
|  | <i>Gram</i> -positive NI (Yes) | -3,052 | 1,592 | 0,056 | -0,074  | 6,178 | 0,006 |
|  | <i>Gram</i> -negative NI (Yes) | -2,715 | 3,894 | 0,486 | -10,364 | 4,934 | 0,001 |
|  | Fungal NI (Yes)                | 6,191  | 7,694 | 0,421 | -21,303 | 8,921 | 0,001 |
